# Supplementary material
Source: publisher figshare collection journal article supplement (https://karger.figshare.com/articles/dataset/_/4010631)
Supplement: Supplementary file 1 [file 1]

## Supplementary Tables S1-S8

**Table S1**

Sample size details for geometric morphometrics analyses shown in figures 2 and 3.

| Group           | Sample size day 0 | Sample size day 90 |
|-----------------|-------------------|--------------------|
| Control females | 5                 | 15                 |
| Control males   | 5                 | 9                  |
| AI females 1    | 5                 | 17                 |
| AI females 2    | 5                 | 16                 |

**Table S2**

Gonado-somatic index (GSI) and sample size of females, males and AI females fish after 168 and 310 days. Fish were used for histology (168 days) and gene expression (310 days). GSI is shown as mean  $\pm$  SD.

|                 | 168 days        |             | 310 days        |             |
|-----------------|-----------------|-------------|-----------------|-------------|
| Group           | GSI             | Sample size | GSI             | Sample size |
| Control females | 1.34 $\pm$ 1.1  | 3           | 2.15 $\pm$ 1.55 | 8           |
| AI females      | 0.46 $\pm$ 0.4  | 3           | 0.72 $\pm$ 0.64 | 6           |
| Control Males   | 0.27 $\pm$ 0.05 | 3           | 0.58 $\pm$ 0.16 | 6           |

**Table S3**

Statistics for gene expression comparisons among control females, control males and AI females (fig. 6). A Kruskal-Wallis test was used to assess group differences. For p-values < 0.05 a Dunn post-hoc test was performed (table S4).

| Gene            | Tissue | chi-squared | p-value |
|-----------------|--------|-------------|---------|
| <i>ara</i>      | brain  | 10.421      | 0.015   |
|                 | gonad  | 8.337       | 0.040   |
| <i>arb</i>      | brain  | 4.156       | 0.245   |
|                 | gonad  | 9.499       | 0.023   |
| <i>cyp19a1a</i> | brain  | 12.450      | 0.006   |
|                 | gonad  | 10.775      | 0.013   |
| <i>cyp19a1b</i> | brain  | 14.226      | 0.003   |
|                 | gonad  | 12.088      | 0.007   |
| <i>foxl2A</i>   | brain  | 4.786       | 0.188   |
|                 | gonad  | 11.894      | 0.008   |
| <i>foxl2B</i>   | brain  | 4.795       | 0.188   |
|                 | gonad  | 0.316       | 0.957   |
| <i>cyp11b2</i>  | brain  | 2.732       | 0.435   |
|                 | gonad  | 11.473      | 0.009   |
| <i>sf-1</i>     | brain  | 2.088       | 0.554   |
|                 | gonad  | 7.565       | 0.056   |
| <i>dmrt1</i>    | gonad  | 11.710      | 0.008   |

**Table S4**

Dunn's post-hoc tests for gene expression data comparisons with a Kruskal-Wallis test  
p-value < 0.05 (see table S3). Shown are Z- and p-values. Significant p-values  
indicated in figure 6 are highlighted in grey.

| <b>Gene &amp; Tissue</b>  | <b>Comparisons</b>        |                           |                      |                         |                         |                           |
|---------------------------|---------------------------|---------------------------|----------------------|-------------------------|-------------------------|---------------------------|
|                           | Females vs.<br>AI day 168 | Females vs.<br>AI day 310 | Females vs.<br>Males | Males vs.<br>AI day 168 | Males vs.<br>AI day 310 | AI day 168<br>vs. day 310 |
| <i>ara</i><br>brain       | -2.709097<br>0.0202       | -2.680355<br>0.0110       | -1.236293<br>0.1298  | 1.638436<br>0.1013      | 1.389089<br>0.1236      | 0.502624<br>0.3076        |
| <i>ara</i><br>gonads      | -1.492437<br>0.1356       | -2.778178<br>0.0164       | -0.899122<br>0.2764  | 0.713774<br>0.2377      | 1.839076<br>0.0989      | -0.837707<br>0.2413       |
| <i>arb</i><br>gonads      | -0.648885<br>0.2582       | -1.662994<br>0.0963       | 1.292488<br>0.1471   | 1.768213<br>0.1155      | 3.012954<br>0.0078      | -0.753937<br>0.2705       |
| <i>dmrt1</i><br>gonads    | -0.308220<br>0.3790       | 0.802150<br>0.2535        | 2.922147<br>0.0104   | 2.838874<br>0.0068      | 2.249933<br>0.0245      | 1.005249<br>0.2361        |
| <i>cyp19a1a</i><br>brain  | -0.697552<br>0.2427       | 2.729267<br>0.0095        | 1.404878<br>0.1200   | 1.914212<br>0.0556      | -1.261919<br>0.1242     | 3.057633<br>0.0067        |
| <i>cyp19a1a</i><br>gonads | 0.210887<br>0.4165        | -0.332598<br>0.4437       | -2.753562<br>0.0177  | -2.595542<br>0.0142     | -2.543403<br>0.0110     | -0.502624<br>0.4614       |
| <i>cyp19a1b</i><br>brain  | -2.757764<br>0.0087       | -3.179253<br>0.0044       | -0.842927<br>0.2396  | 2.027767<br>0.0319      | 2.298845<br>0.0215      | 0.125656<br>0.4500        |
| <i>cyp19a1b</i><br>gonads | -0.178443<br>0.4292       | -1.193443<br>0.1745       | 2.135415<br>0.0491   | 2.027767<br>0.0426      | 3.423811<br>0.0019      | -0.837707<br>0.2413       |
| <i>foxl2a</i><br>gonads   | -0.259554<br>0.3976       | -1.144531<br>0.1893       | -3.203123<br>0.0041  | -2.514432<br>0.0179     | -2.201021<br>0.0277     | -0.712051<br>0.2859       |
| <i>cyp11b2</i><br>gonads  | 0.227109<br>0.4102        | -0.753238<br>0.2708       | 2.416391<br>0.0235   | 1.865546<br>0.0621      | 3.277077<br>0.0031      | -0.879593<br>0.2843       |

**Table S5**

Measurements of focal fish and stimulus pair information as used for the behavioural experiments shown in figures 7 and S5-S9.

| <b>Group</b> | <b>Individual</b> | <b>Total length (mm)</b> | <b>Standard length (mm)</b> | <b>Weight (g)</b> | <b>Used with stimulus pair</b> |
|--------------|-------------------|--------------------------|-----------------------------|-------------------|--------------------------------|
| Female       | F1                | 63.62                    | 51.44                       | 4.51              | 1                              |
| Female       | F2                | 63.60                    | 51.20                       | 4.74              | 2                              |
| Female       | F3                | 61.95                    | 49.61                       | 3.07              | 3                              |
| Female       | F4                | 59.77                    | 47.82                       | 3.29              | 4                              |
| Female       | F5                | 63.86                    | 50.47                       | 3.76              | 5                              |
| Female       | F6                | 58.89                    | 46.53                       | 3.10              | 6                              |
| Female       | F7                | 58.73                    | 46.67                       | 2.78              | 7                              |
| Male         | M1                | 75.58                    | 59.51                       | 6.14              | 1                              |
| Male         | M2                | 74.37                    | 58.84                       | 6.85              | 2                              |
| Male         | M3                | 74.75                    | 58.66                       | 6.71              | 3                              |
| Male         | M4                | 72.90                    | 58.63                       | 5.43              | 4                              |
| Male         | M5                | 71.57                    | 55.40                       | 5.28              | 5                              |
| Male         | M6                | 66.78                    | 53.91                       | 4.42              | 6                              |
| Male         | M7                | 64.33                    | 51.59                       | 4.28              | 7                              |
| AI           | AI1               | 75.46                    | 59.76                       | 5.65              | 1                              |
| AI           | AI2               | 76.38                    | 59.64                       | 6.61              | 2                              |
| AI           | AI3               | 71.32                    | 56.21                       | 5.17              | 3                              |
| AI           | AI4               | 72.81                    | 55.95                       | 4.96              | 4                              |
| AI           | AI5               | 70.02                    | 54.90                       | 5.30              | 5                              |
| AI           | AI6               | 65.21                    | 52.43                       | 3.56              | 6                              |
| AI           | AI7               | 67.85                    | 51.36                       | 4.65              | 7                              |

**Table S6**

Measurements and pair information of stimulus fishes used for the behavioural experiments shown in figures 7 and S5-S9.

| Individual | Total length (mm) | Standard length (mm) | Weight (g) | Sex    | Belonging to stimulus pair |
|------------|-------------------|----------------------|------------|--------|----------------------------|
| F8         | 58.72             | 46.61                | 2.55       | Female | 1                          |
| F9         | 58.67             | 46.46                | 2.59       | Female | 2                          |
| F10        | 55.60             | 44.94                | 2.98       | Female | 3                          |
| F11        | 55.25             | 45.55                | 3.59       | Female | 4                          |
| F12        | 55.05             | 44.65                | 2.79       | Female | 5                          |
| F13        | 54.07             | 43.26                | 2.80       | Female | 6                          |
| F14        | 53.59             | 44.81                | 2.90       | Female | 7                          |
| M8         | 89.87             | 71.13                | 11.58      | Male   | 1                          |
| M9         | 83.33             | 64.92                | 7.49       | Male   | 2                          |
| M10        | 83.05             | 64.65                | 8.64       | Male   | 3                          |
| M11        | 82.95             | 64.16                | 8.78       | Male   | 4                          |
| M12        | 80.09             | 63.38                | 6.63       | Male   | 5                          |
| M13        | 79.07             | 61.62                | 7.84       | Male   | 6                          |
| M14        | 74.30             | 60.89                | 7.39       | Male   | 7                          |

**Table S7**

Friedman test for experiments shown in figure 7.

|                                             | Friedman Test |         |
|---------------------------------------------|---------------|---------|
|                                             | chi-squared   | p-value |
| Fig. 7A Time spent in female choice zone    | 6.000         | 0.0498  |
| Fig. 7B Time spent in male choice zone      | 1.143         | 0.5647  |
| Fig. 7C Number of displays                  | 8.000         | 0.0183  |
| Fig. 7D Presence of eye-bar in choice zones | 8.963         | 0.0113  |

**Table S8**

Pairwise Wilcoxon post-hoc test for Friedman tests with  $p < 0.05$  in Table S7 (marked in grey) and figure 7.

|                                             | p-values of Pairwise Wilcoxon post-hoc test |                   |              |                      |                   |              |
|---------------------------------------------|---------------------------------------------|-------------------|--------------|----------------------|-------------------|--------------|
|                                             | Uncorrected                                 |                   |              | Bonferroni-corrected |                   |              |
|                                             | Females vs. AI                              | Females vs. Males | Males vs. AI | Females vs. AI       | Females vs. Males | Males vs. AI |
| Fig. 7A Time spent in female zone           | 0.016                                       | 0.109             | 0.375        | 0.047                | 0.328             | 1.000        |
| Fig. 7C Number of displays                  | 0.034                                       | 0.016             | 0.866        | 0.103                | 0.047             | 1.000        |
| Fig. 7D Presence of eye-bar in choice zones | 0.036                                       | 0.074             | 0.150        | 0.110                | 0.220             | 0.450        |
